# Supplementary material
Source: MDPI journal article supplement (https://www.mdpi.com/2673-4583/10/1/34)
Supplement: s1 [file s1]

**IOCAG  
2022**

**The 1st International Online Conference on Agriculture:  
ADVANCES IN AGRICULTURAL SCIENCE AND TECHNOLOGY**

**10-25 FEBRUARY 2022 | ONLINE**

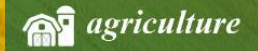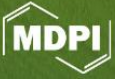

# **Real-Time IoT-Enabled Water Management for Rooftop Urban Agriculture Using Commercial Off-the-Shelf Products**

**By:**

**Tamer Almaaitah<sup>1</sup>, Darko Joksimovic<sup>1</sup>, and Tahmid Sajin<sup>2</sup>**

<sup>1</sup>Department of Civil Engineering, Ryerson University, Toronto, ON, Canada

<sup>2</sup>Rogers Communications, Brampton, ON, Canada

# Outline

- Introduction: Urban Agriculture (UA) and Internet of Things (IoT)
- Learning objectives
- Study site: Urban Farm Living Lab (UFLL)
- Hands-on guide to low-cost wireless monitoring of rooftop runoff
- Lessons learned and key takeaways

# Introduction

ryerson.ca

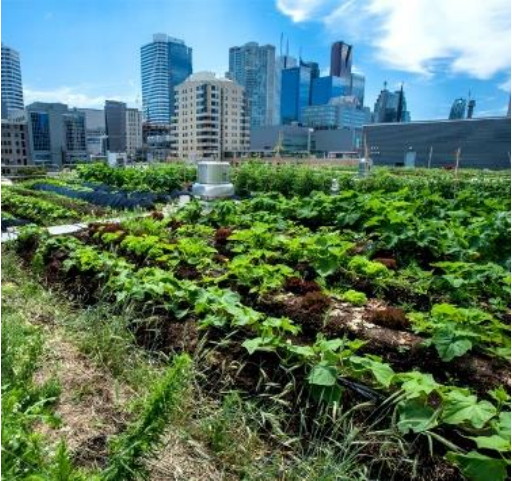

- Increased interest in urban agriculture and rooftop farming
- The need to:
  - Improve the stormwater management on rooftops farms at a lower cost
  - Inform urban planning and policy
  - Develop design guidance
- Internet of Things (IoT) provides us with new opportunities: Wi-Fi, Bluetooth and LPWAN
- LoRaWAN: long-range transmission and low-power requirement

javatpoint.com

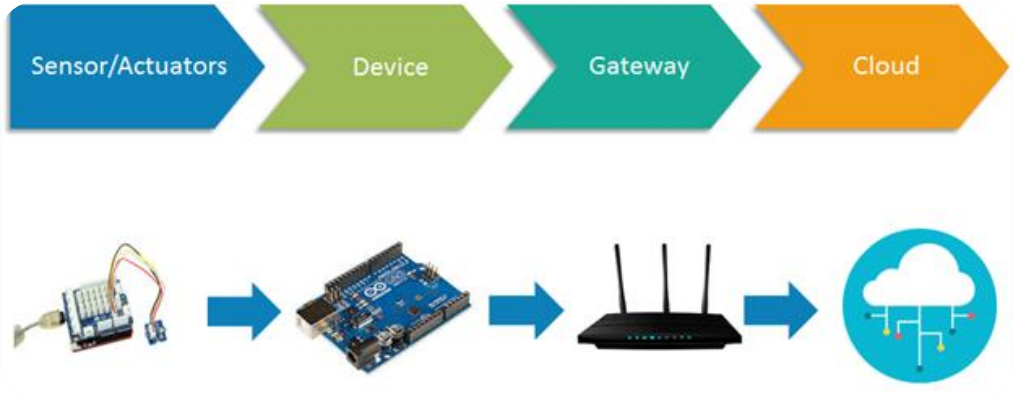

# Learning Objectives

The objectives of this presentation are to:

- Understand how the Internet of Things (IoT) can transform the stormwater management of a rooftop farm into a more efficient and innovative process
- Develop a low-cost sensor node that can send data wirelessly through the internet
- Integrate the node into a cloud-based platform and dashboard where data can be accessed in real-time and downloaded remotely

# Study Site: Urban Farm Living Lab (UFLL)

- Rooftop of George Vari Engineering and Computing Centre at the campus
- Intensive green roof in 2004 and converted into a rooftop farm in 2014
- Grows around 3,500 to 4,500 kilograms of produce annually
- Split into zones (A, B, C and D) with three roof drains equipped with V-notch weirs
- Weirs were designed to allow flow monitoring

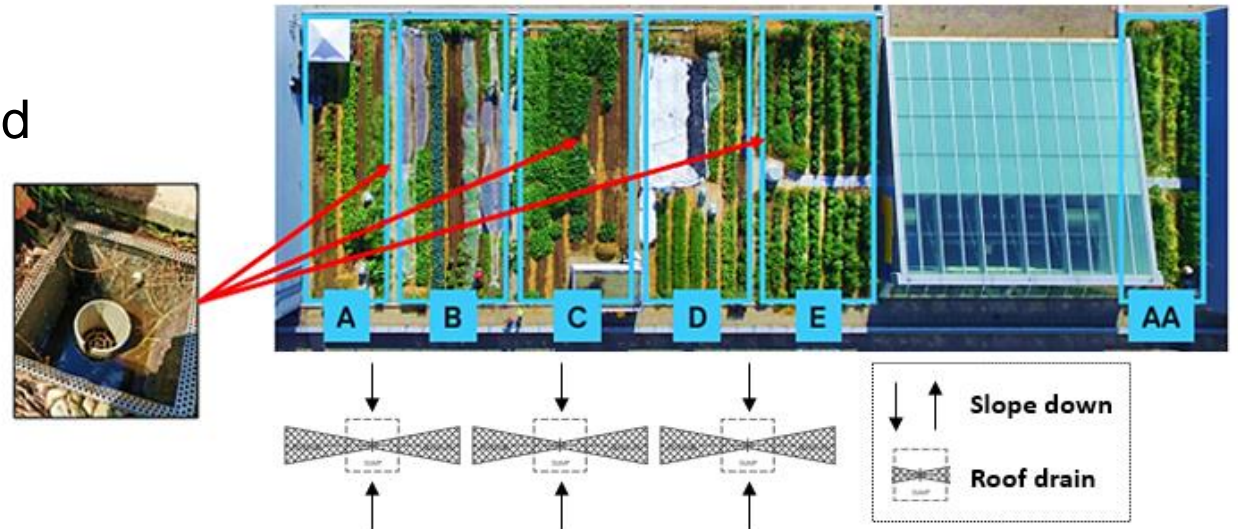

# 4-Step Hands-On Approach

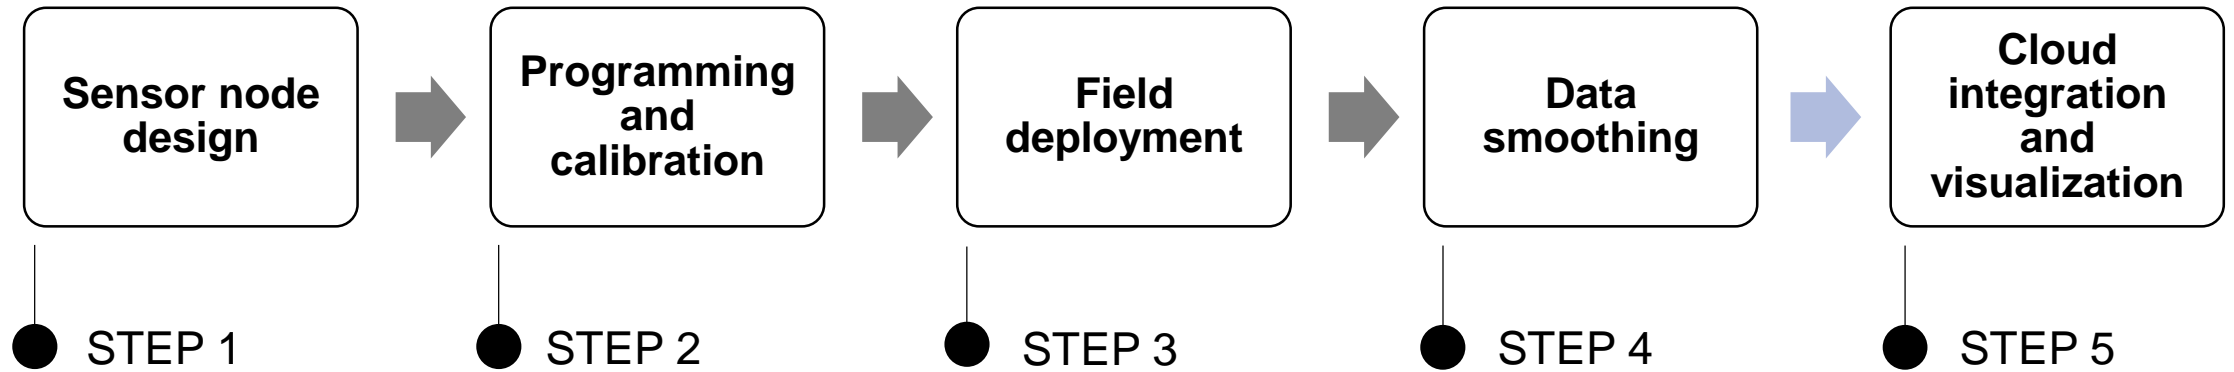

# STEP 1: Sensor node design

| #            | Item                               | Price in \$USD |
|--------------|------------------------------------|----------------|
| 1            | Dragino LSN50 Generic LoRaWAN node | \$43           |
| 2            | eTape liquid level sensor – 5"     | \$49           |
| 3            | Polycarbonate tube and housing cap | \$14           |
| 4            | Resistor and wire tube             | \$8            |
| <b>TOTAL</b> |                                    | <b>\$115</b>   |

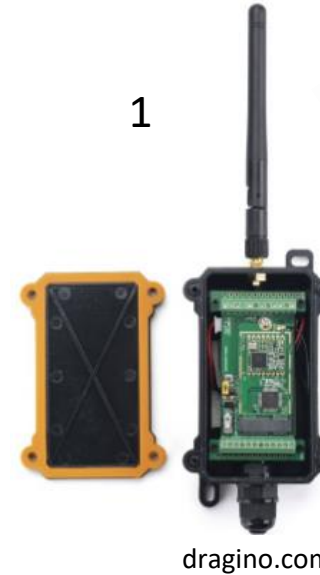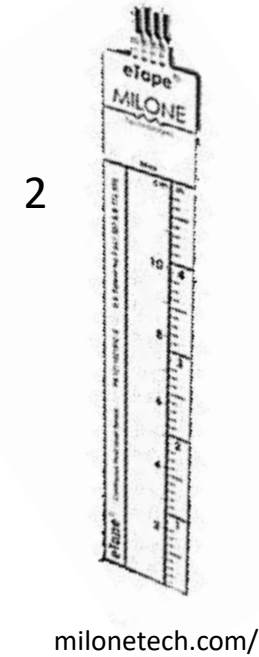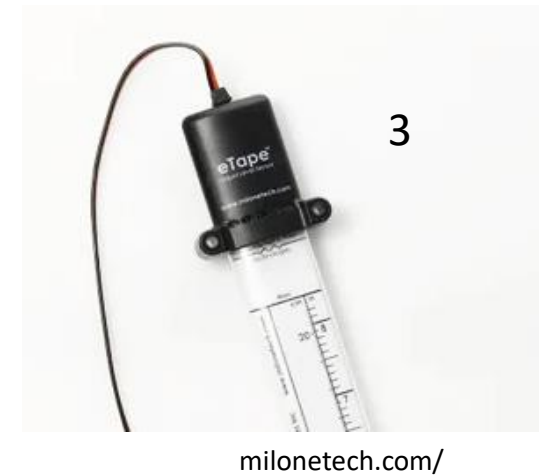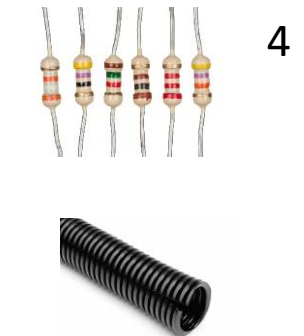

# STEP 1: Sensor Node Design

- Voltage/resistance divider
- Utilizing two pins of the eTape (P2, P3) and a resistor connected between P3 of the eTape and the GND of the LSN50
- P3 of the eTape delivers the analog input in volts
- The resistor can be in the range of 0 to 2000 ohm
- Corrected resistance output can be measured and used for calibration and into the code

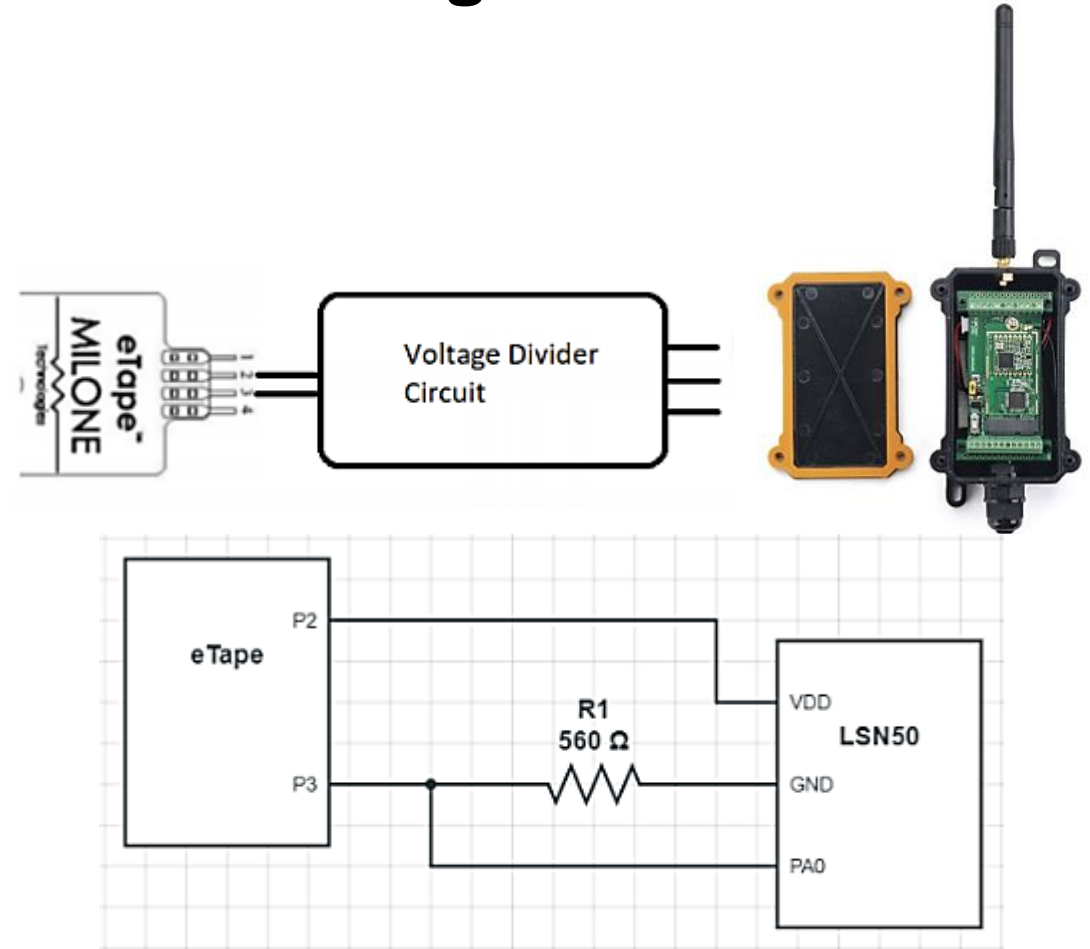

Figure 5b: Voltage divider circuit of eTape.



# STEP 2: Programming and calibration

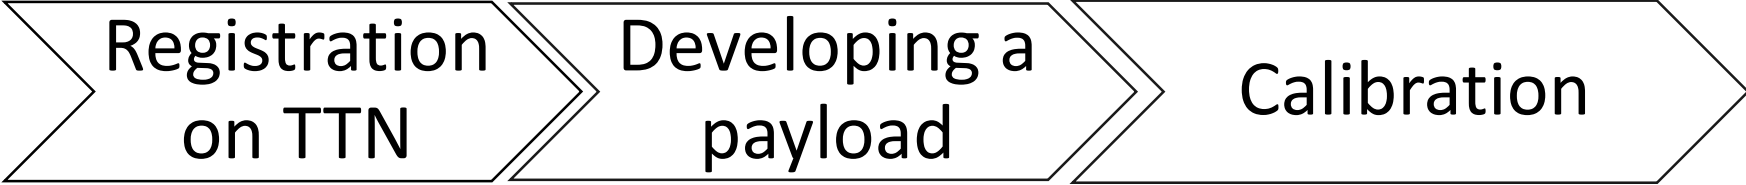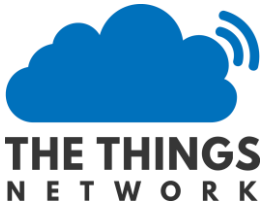

Using:

- Device EUI
- APP Key
- Application EUI

- Working with Bytes
- Commercially-available nodes usually come with their own payloads
- Slight modification may be necessary

- Varying water level to get the corresponding voltage reading

# STEP 2: Programming and calibration

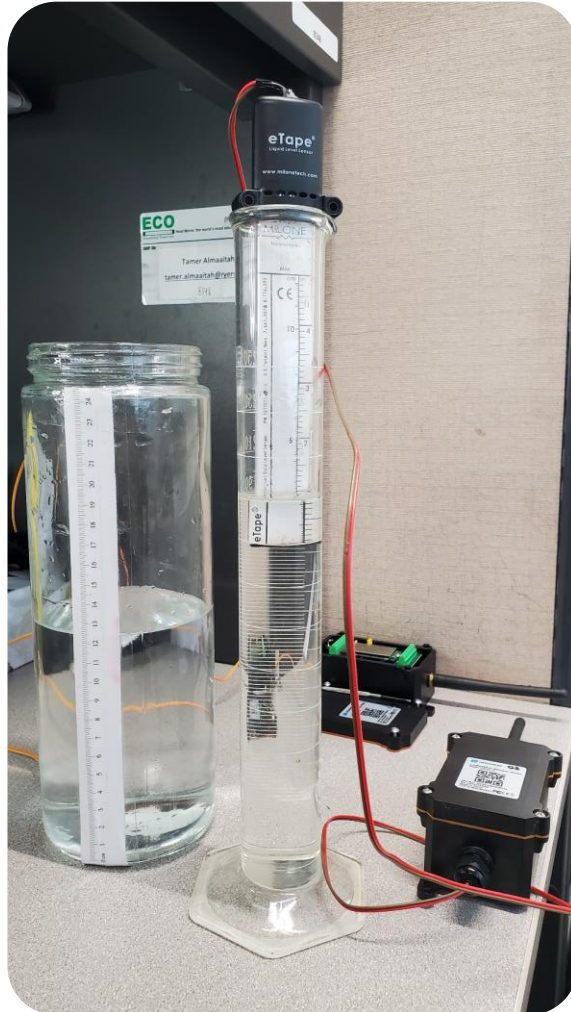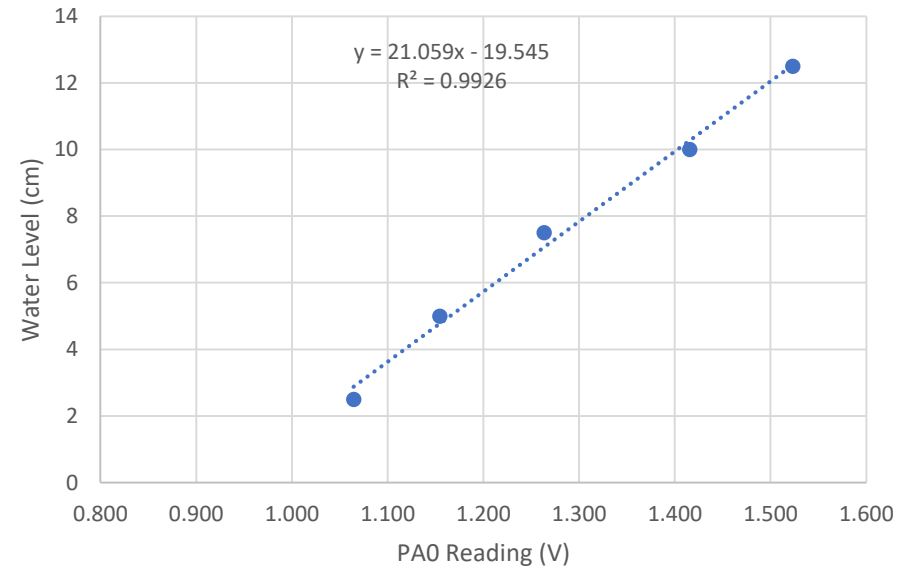

Varying water level to get the corresponding voltage reading

# STEP 3: Field deployment

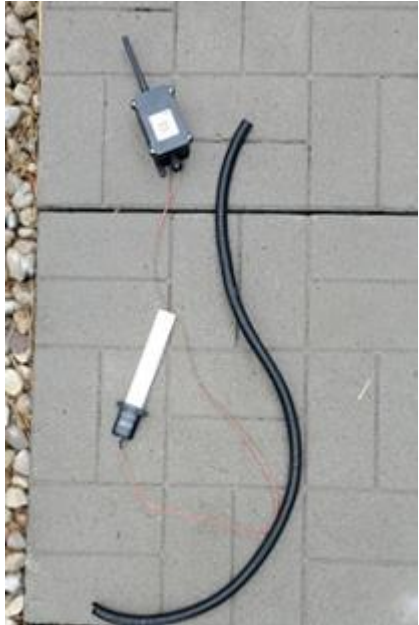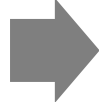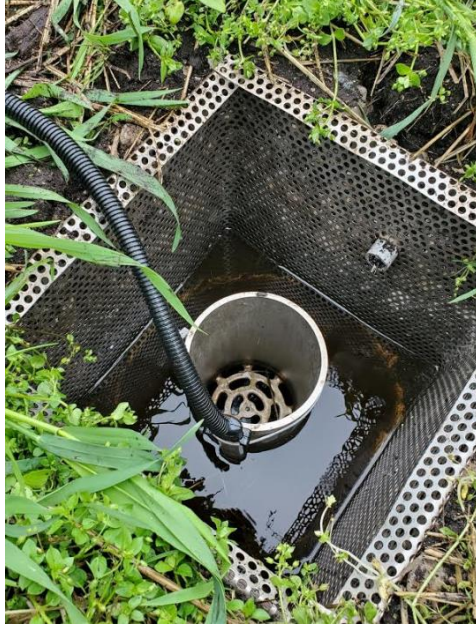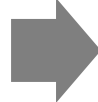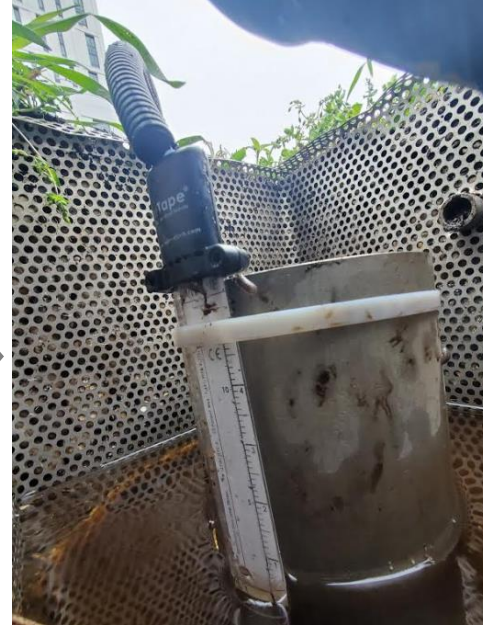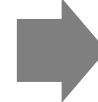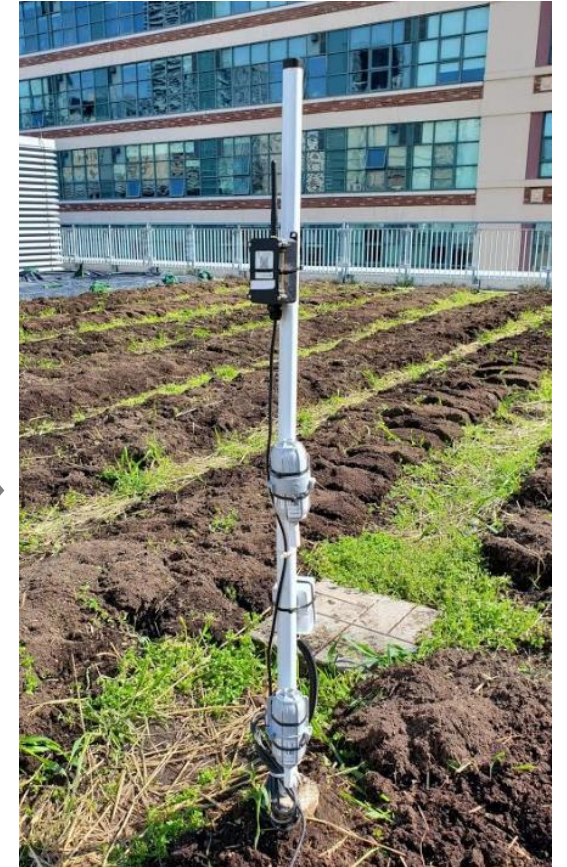

# STEP 4: Data Smoothing

- The developed sensor node provided consistency and high-quality data over the season
- To address the sensor noise, water level data were smoothed to reduce dispersion and remove outliers using the exponential smoothing (ES) method.

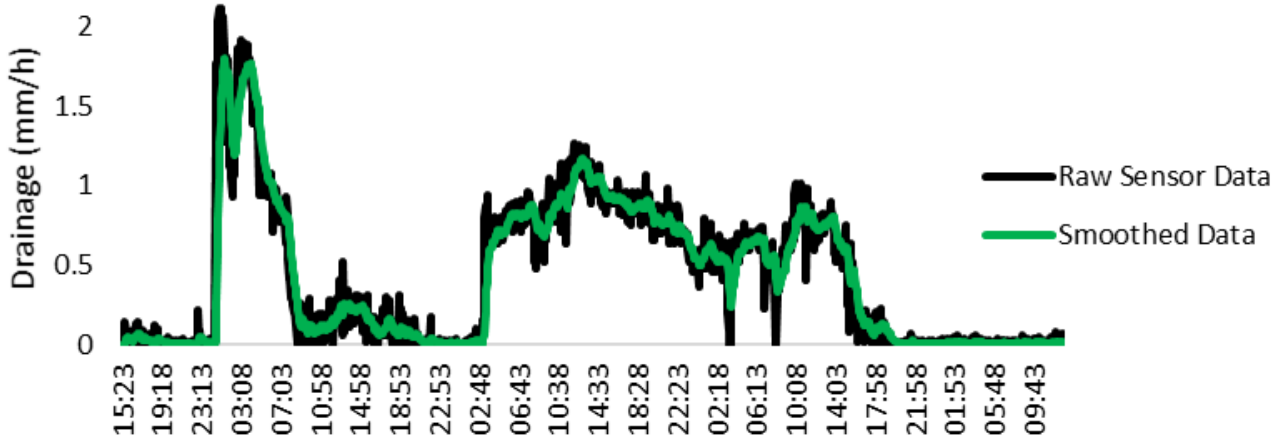

# STEP 5: Cloud integration and visualization

- A variety of IoT platform integrations to receive messages from sensors through TTN
- Ubidots has been used for this study
- Store and visualize data

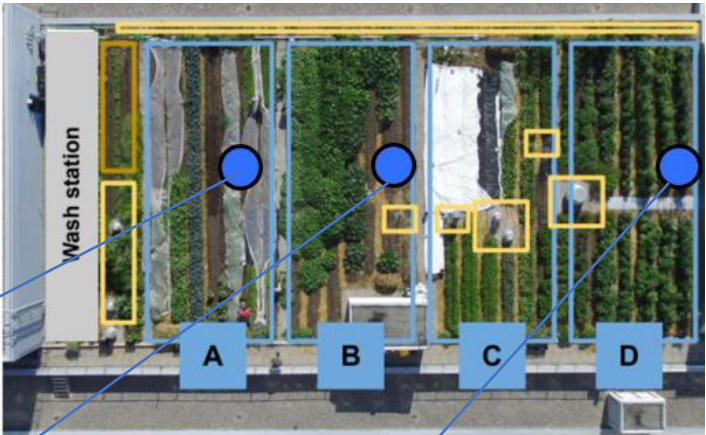

All water level measurements are in cm

● : Roof drain

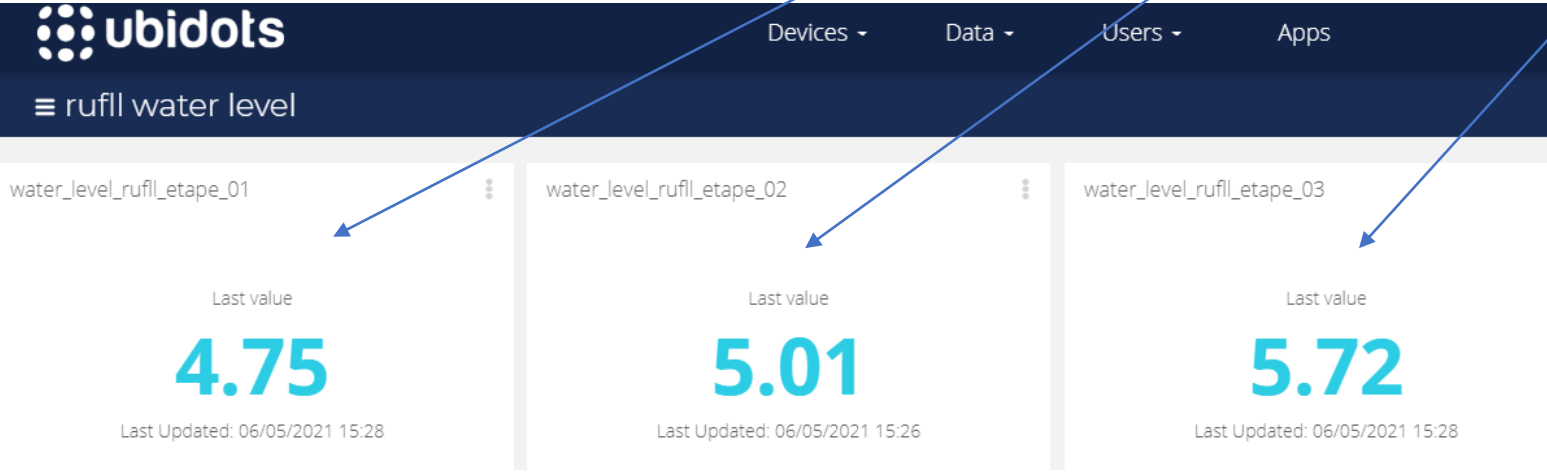

# STEP 5: Cloud integration and visualization

- Create conditional events and alerts
- Reducing site visits and possibility of losing data!

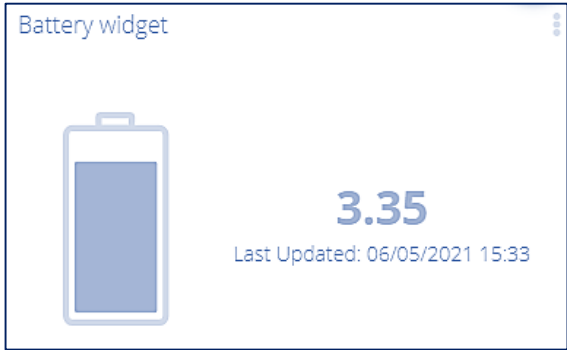

**If triggers** then **actions**

a840413b9182dc46: batv + Value  is Less than  3 for 0 minutes

**If triggers** then **actions**

Country Phone Number

+1 Canada

+ Add phone number

**ACTIVE TRIGGER** **BACK TO NORMAL**

Message

Warning: battery needs replacement

# Lessons learned and key takeaways

- Careful water use and managed stormwater have become imperative in achieving sustainability goals through urban farming
- The reduced cost of sensors and communication nodes and the availability of open-source projects encourage the runoff monitoring of rooftop farms
- Wireless sensor nodes allow easier deployment of various sensors and increase flexibility for monitoring
- Future research will have to analyze energy usage and optimization further

**IOCAG  
2022**

**The 1st International Online Conference on Agriculture:  
ADVANCES IN AGRICULTURAL SCIENCE AND TECHNOLOGY**

**10-25 FEBRUARY 2022 | ONLINE**

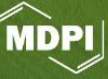

## **Real-Time IoT-Enabled Water Management for Rooftop Urban Agriculture Using Commercial Off-the-Shelf Products**

**End of Presentation – Thank You**

**Tamer Almaaitah<sup>1</sup>\*, Darko Joksimovic<sup>1</sup>, and Tahmid Sajin<sup>2</sup>**

**\* [tamer.almaaitah@ryerson.ca](mailto:tamer.almaaitah@ryerson.ca)**
